# Supplementary material for: Squaramide-based tripodal ionophores for potentiometric sulfate-selective sensors with high selectivity
Source: Royal Society of Chemistry journal article supplement (doi:10.1039/c5an00259a), 2015-01-01
Supplement: c5an00259a1.pdf [file c5an00259a1.pdf]

Supporting Information for

Squaramide-based Tripodal Ionophores for Potentiometric Sulfate-selective Sensors with High  
Selectivity

Yueling Liu<sup>1</sup>, Yu Qin<sup>1\*</sup>, Dechen Jiang<sup>1,2\*</sup>

<sup>1</sup>.State Key Laboratory of Analytical Chemistry for Life science, School of Chemistry and  
Chemical Engineering, Nanjing University, Nanjing, China, 210093.

<sup>2</sup>.State Key Laboratory of Soil and Sustainable Agriculture, Institute of Soil Science, Chinese  
Academy of Sciences.

Fax: +86-25-83592562 (Y.Q) and +86-25-83594846 (D.J);

Tel: +86-25-83592562 (Y.Q) and +86-25-83594846 (D.J);

E-mail: qinyu75@nju.edu.cn(Y.Q) and dechenjiang@nju.edu.cn (D.J)

1. Characterization of ionic sites

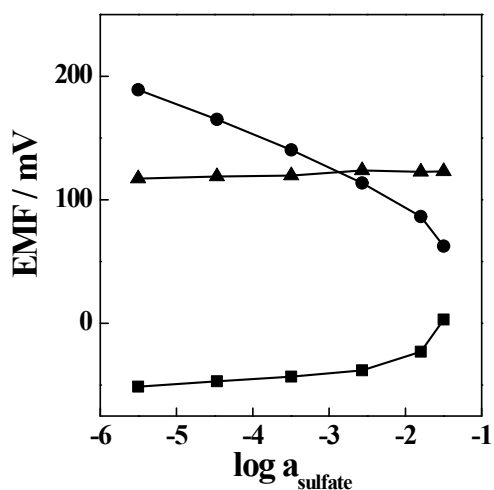

Figure S1: Sulfate responses of Ionophore III-based membranes in the presence and absence of ionic sites (●, TDMACl; ▲, no ionic sites; ■, NaTFPB)

2. Experiential data for the detection of sulfate in cellular lysate and drinking water.

---

Table S1. Determination of Sulfate in Drinking Water and Cell Extracts by Ionophore III-based

Electrodes ( $n=3$ )

| Samples        | Average found               | Mean EMF value / mV |
|----------------|-----------------------------|---------------------|
| Cell lysates   | $337.9 \pm 0.5 \mu\text{M}$ | $216.02 \pm 0.1$    |
|                | $3.51 \pm 0.2 \text{ mM}$   | $192.49 \pm 0.6$    |
| Drinking water | $66.6 \pm 0.4 \text{ mg}$   | $129.75 \pm 0.7$    |
|                | $266.3 \pm 0.9 \text{ mg}$  | $114.75 \pm 0.4$    |

---
